# Supplementary material
Source: Springer Nature journal article supplement (https://www.springermedizin.de/resource/supplementary/12906_2010_307_MOESM2_ESM.pdf/9519386)

Volume (%)

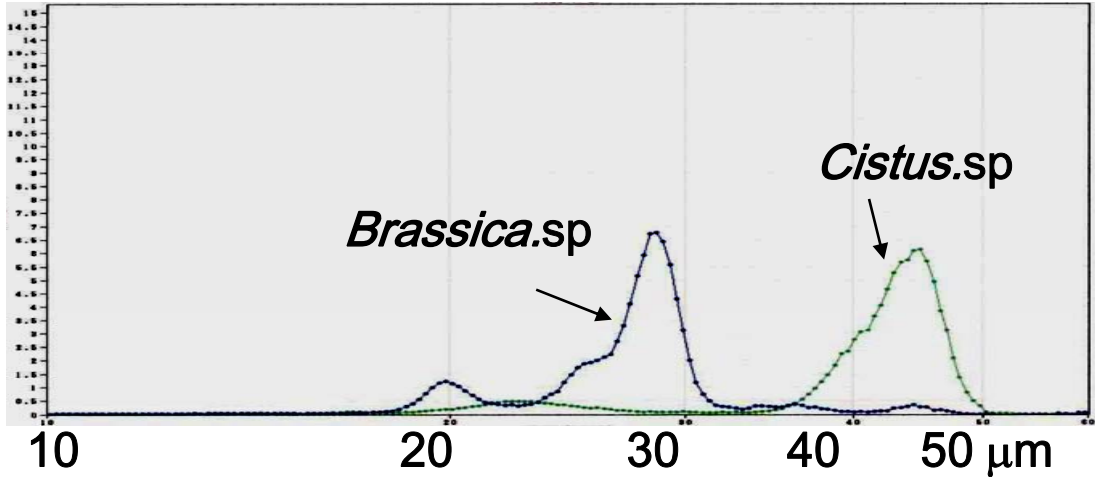

*Brassica.sp*

*Cistus.sp*

10

20

30

40

50  $\mu\text{m}$

Supplement: MOESM2 [file 9519386]
